# Supplementary material
Source: Springer Nature journal article supplement (https://cris.unibo.it/retrieve/2f383f60-ffdb-4606-8559-f0f47c33c15d/10531_2026_3294_MOESM1_ESM.docx)
Supplement: MOESM1 [file 10531_2026_3294_MOESM1_ESM.docx]

**SUPPLEMENTARY**

**Table S1.** List of the butterflies’ species counted in the city of Bologna. The table shows: the IUCN category, the total number of individuals per species found in each cluster (CL); the total number of individuals per species found in the whole study area.

| **Family** | **Species** | **Category** | **N of individuals/ Cluster** | | | | **Total** |
| --- | --- | --- | --- | --- | --- | --- | --- |
| **IUCN Italy** | **CL1** | **CL2** | **CL3** | **CL4** |
| Erebidae | *Spiris_slovenica* | ND |  | 1 |  |  | 1 |
| Hesperiidae | *Pyrgus_armoricanus* | LC | 1 |  |  |  | 1 |
| *Pyrgus_malvoides* | LC |  |  |  | 4 | 4 |
| *Thymelicus_acteon* | LC | 21 | 4 | 3 | 4 | 32 |
| Lycaenidae | *Aricia_agestis* | LC | 7 | 8 | 2 | 16 | 33 |
| *Cacyreus_marshalli* | allochthonous |  |  | 3 | 2 | 5 |
| *Callophrys_rubi* | LC |  |  | 2 |  | 2 |
| *Celastrina_argiolus* | LC |  | 1 | 1 | 1 | 3 |
| *Leptotes_pirithous* | LC |  | 2 |  |  | 2 |
| *Lycaena_phlaeas* | LC | 2 | 2 | 1 | 8 | 13 |
| *Lycaena_tityrus* | LC | 2 | 1 |  |  | 3 |
| *Lysandra_bellargus* | ND | 1 |  |  |  | 1 |
| *Plebejus_argus* | LC | 25 | 34 | 28 | 66 | 153 |
| *Plebejus_idas* | LC | 18 | 3 |  | 4 | 25 |
| *Polyommatus_icarus* | LC | 26 | 31 | 27 | 67 | 151 |
| *Polyommatus_thersites* | LC |  |  | 12 | 3 | 15 |
| Nymphalidae | *Boloria_dia* | LC | 4 | 6 |  | 2 | 12 |
| *Brintesia_circe* | ND |  |  |  | 3 | 3 |
| *Coenonympha_pamphilus* | LC | 57 | 46 | 16 | 52 | 171 |
| *Hipparchia_alcyone_ssp._genova* | ND |  |  |  | 2 | 2 |
| *Lasiommata_megera* | LC | 15 | 13 | 2 | 16 | 46 |
| *Limenitis_reducta* | LC |  |  |  | 28 | 28 |
| *Maniola_jurtina* | LC | 16 | 20 | 9 | 23 | 68 |
| *Melanargia_galathea* | LC |  | 1 |  | 10 | 11 |
| *Melitaea_didyma* | LC |  |  |  | 5 | 5 |
| *Melitaea_phoebe* | LC | 4 |  |  | 4 | 8 |
| *Pyronia_tithonus* | LC |  |  |  | 5 | 5 |
| *Vanessa_atalanta* | LC | 25 | 8 | 19 | 6 | 58 |
| *Vanessa_cardui* | LC |  |  | 1 | 2 | 3 |
| Papilionidae | *Iphiclides_podalirius* | LC | 8 | 5 | 14 | 22 | 49 |
| *Papilio_machaon* | LC |  | 2 | 4 | 3 | 9 |
| *Zerynthia_cassandra** | LC |  | 1 |  |  | 1 |
| Pieridae | *Anthocharis_cardamines* | LC |  |  | 1 | 1 | 2 |
| *Colias_crocea* | LC | 3 | 8 | 7 | 12 | 30 |
| *Gonepteryx_rhamni* | LC |  | 1 |  |  | 1 |
| *Leptidea_sinapis* | LC |  | 2 |  |  | 2 |
| *Pieris_brassicae* | LC | 45 | 39 | 65 | 29 | 178 |
| *Pieris_rapae* | LC | 99 | 96 | 129 | 89 | 413 |
| *Pontia_edusa* | ND |  |  |  | 2 | 2 |
| Zygarnidae | *Zygaena_loti* | ND |  | 1 |  | 2 | 3 |
| **TOTAL N INDIVIDUALS** | | | **379** | **336** | **346** | **493** | **1554** |
| **TOTAL N SPECIES** | | | **19** | **25** | **20** | **31** | **40** |
| *listed in Annex IV of the Habitats Directive (92/43/EEC) | | |  |  |  |  |  |

**Table S2.** List of the birds’ species sighted in the city of Bologna. The table shows: the IUCN category, the maximum number of individuals per species found in each cluster (CL); the total number of individuals per species found in the whole study area.

| **Family** | **Species** | **Category** | **N max of individuals/ Cluster** | | | | **Total** |
| --- | --- | --- | --- | --- | --- | --- | --- |
| **IUCN Italy** | **CL1** | **CL2** | **CL3** | **CL4** |
| Accipitridae | *Buteo_buteo* | LC | 3 |  | 1 | 1 | 5 |
| *Pernis_apivorus* | LC |  |  |  | 1 | 1 |
| Anatidae | *Anas_platyrhynchos* | LC | 15 | 20 | 2 | 6 | 43 |
| Apodidae | *Apus_apus/pallidus* | LC | 32 | 75 | 93 | 37 | 237 |
| *Tachymarptis_melba* | LC |  |  |  | 5 | 5 |
| Upupidae | *Upupa_epops* | LC | 6 | 1 | 4 | 2 | 13 |
| Charadriidae | *Charadrius_dubius* | Not breeding | 1 |  |  |  | 1 |
| *Vanellus_vanellus* | Not breeding | 1 |  |  |  | 1 |
| Laridae | *Larus_michahellis* | LC | 2 | 1 | 9 |  | 12 |
| Recurvirostridae | *Himantopus_himantopus* | LC | 8 |  |  |  | 8 |
| Scolopacidae | *Gallinago_gallinago* | Not breeding | 2 |  |  |  | 2 |
| *Tringa_glareola* | Not breeding | 1 |  |  |  | 1 |
| Columbidae | *Columba_livia_domestica* | Allochthonous | 110 | 32 | 73 | 8 | 223 |
| *Columba_palumbus* | LC | 64 | 34 | 43 | 27 | 168 |
| *Streptopelia_decaocto* | LC | 7 | 4 | 21 | 1 | 33 |
| *Streptopelia_turtur* | LC* | 4 | 4 | 4 | 3 | 15 |
| Alcedinidae | *Alcedo_atthis* | NT | 2 |  |  | 1 | 3 |
| Meropidae | *Merops_apiaster* | LC | 1 |  |  | 3 | 4 |
| Cuculidae | *Cuculus_canorus* | NT |  |  |  | 5 | 5 |
| Falconidae | *Falco_peregrinus* | LC | 1 |  | 1 | 2 | 4 |
| *Falco_subbuteo* | LC |  |  |  | 1 | 1 |
| *Falco_tinnunculus* | LC | 1 | 3 | 3 | 1 | 8 |
| Phasianidae | *Phasianus_colchicus* | Alloctona | 44 | 17 | 15 | 9 | 85 |
| Rallidae | *Fulica_atra* | LC | 6 |  |  |  | 6 |
| *Gallinula_chloropus* | LC | 8 | 5 | 1 |  | 14 |
| Acrocephalidae | *Hippolais_polyglotta* | LC |  |  |  | 1 | 1 |
| Aegithalidae | *Aegithalos_caudatus* | LC | 1 | 5 | 9 | 6 | 21 |
| Alaudidae | *Alauda_arvensis* | VU | 2 |  |  |  | 2 |
| Certhiidae | *Certhia_brachydactyla* | LC | 1 | 1 | 2 | 2 | 6 |
| Cisticolidae | *Cisticola_juncidis* | LC | 5 |  |  | 3 | 8 |
| Corvidae | *Coloeus_monedula* | LC | 11 | 5 | 3 | 3 | 22 |
| *Corvus_cornix* | LC | 33 | 19 | 35 | 19 | 106 |
| *Garrulus_glandarius* | LC | 10 | 4 | 4 | 5 | 23 |
| *Pica_pica* | LC | 29 | 8 | 14 | 7 | 58 |
| Emberizidae | *Emberiza_cirlus* | LC |  |  |  | 14 | 14 |
| Fringillidae | *Carduelis_carduelis* | NT | 6 | 4 | 23 | 4 | 37 |
| *Chloris_chloris* | VU |  | 2 | 4 | 1 | 7 |
| *Fringilla_coelebs* | LC | 6 | 8 | 9 | 7 | 30 |
| *Serinus_serinus* | LC | 3 | 3 | 18 | 5 | 29 |
| Hirundinidae | *Delichon_urbicum* | NT | 1 | 20 | 6 | 1 | 28 |
| *Hirundo_rustica* | NT | 68 | 1 | 11 | 14 | 94 |
| *Ptyonoprogne_rupestris* | LC |  | 1 |  |  | 1 |
| *Riparia_riparia* | VU | 1 |  |  |  | 1 |
| Laniidae | *Lanius_collurio* | VU |  |  |  | 1 | 1 |
| Motacillidae | *Anthus_pratensis* | Not breeding | 5 |  |  |  | 5 |
| *Motacilla_alba* | LC | 1 |  |  |  | 1 |
| *Motacilla_cinerea* | LC |  |  |  | 1 | 1 |
| *Motacilla_flava* | NT | 5 |  |  |  | 5 |
| Muscicapidae | *Erithacus_rubecula* | LC |  | 1 |  | 6 | 7 |
| *Luscinia_megarhynchos* | LC | 21 | 11 | 8 | 10 | 50 |
| *Muscicapa_striata* | LC | 2 |  |  |  | 2 |
| *Phoenicurus_ochruros* | LC | 1 |  | 2 | 1 | 4 |
| *Phoenicurus_phoenicurus* | LC | 4 | 6 | 8 | 5 | 23 |
| Oriolidae | *Oriolus_oriolus* | LC | 4 | 1 |  | 3 | 8 |
| Paridae | *Cyanistes_caeruleus* | LC | 2 | 1 | 4 | 4 | 11 |
| *Parus_major* | LC | 12 | 14 | 26 | 11 | 63 |
| Passeridae | *Passer_italiae* | VU* | 17 | 2 | 3 |  | 22 |
| Phylloscopidae | *Phylloscopus_collybita* | LC | 1 |  | 1 | 1 | 3 |
| Regulidae | *Regulus_ignicapilla* | LC |  | 2 |  | 3 | 5 |
| Sittidae | *Sitta_europaea* | LC | 2 | 5 | 2 |  | 9 |
| Sturnidae | *Sturnus_vulgaris* | LC | 211 | 187 | 104 | 19 | 521 |
| Sylviidae | *Curruca_subalpina* | LC | 1 | 2 |  | 2 | 5 |
| *Sylvia_atricapilla* | LC | 16 | 14 | 17 | 18 | 65 |
| Troglodytidae | *Troglodytes_troglodytes* | LC |  | 4 |  | 2 | 6 |
| Turdidae | *Turdus_merula* | LC | 21 | 18 | 39 | 13 | 91 |
| *Turdus_philomelos* | LC |  |  |  | 1 | 1 |
| Ardeidae | *Ardea_cinerea* | Not breeding | 2 | 2 | 1 | 2 | 7 |
| *Bubulcus_ibis* | Not breeding | 4 | 1 |  | 3 | 8 |
| *Egretta_garzetta* | Not breeding | 2 | 2 |  | 3 | 7 |
| *Nycticorax_nycticorax* | Not breeding |  | 2 |  | 1 | 3 |
| Picidae | *Dendrocopos_major* | LC | 5 | 6 | 7 | 4 | 22 |
| *Dryobates_minor* | LC |  |  |  | 1 | 1 |
| *Picus_viridis* | LC | 5 | 9 | 4 | 7 | 25 |
| Podicipedidae | *Tachybaptus_ruficollis* | LC | 13 |  |  |  | 13 |
| Psittaculidae | *Psittacula_krameri* | Alloctona | 44 | 14 | 14 | 1 | 73 |
| Strigidae | *Athene_noctua* | LC |  |  | 1 |  | 1 |
| Phalacrocoracidae | *Microcarbo_pygmaeus* | LC | 1 | 1 | 1 |  | 3 |
| *Phalacrocorax_carbo* | LC |  |  | 5 |  | 5 |
| **TOTAL MAX. N INDIVIDUALS** | | | 898 | 582 | 655 | 328 | 2463 |
| **TOTAL N SPECIES** | | | 60 | 46 | 43 | 57 | 78 |
| * VU at Global level | | |  |  |  |  |  |

| **% DISSIMILARITY** | **55.57%** | | | **55.62%** | | | **56.97%** | | | **57.38%** | | | | **57.93%** | | | | **62.86%** | | |
| --- | --- | --- | --- | --- | --- | --- | --- | --- | --- | --- | --- | --- | --- | --- | --- | --- | --- | --- | --- | --- |
| **SPECIES** | **CL1** | **CL2** | **%C.** | **CL2** | **CL4** | **%C.** | **CL1** | **CL3** | **%C.** | **CL2** | **CL3** | **%C.** | **CL1** | | **CL4** | **%C.** | **CL3** | | **CL4** | **%C.** |
| ***Pieris rapae*** | 24.0 | 23.0 | 13.5 | 23.0 | 14.8 | 11.9 | 24.0 | 30.1 | 15.8 | 23.0 | 30.1 | 15.5 | 24.0 | | 14.8 | 11.3 | **30.1** | | **14.8** | 14.8 |
| ***Pieris brassicae*** | 11.4 | 12.0 | 8.5 | 12.0 | 7.6 | 7.8 | 11.4 | 20.3 | 10.9 | 12.0 | 20.3 | 9.7 | 11.4 | | 7.6 | 7.8 | **20.3** | | **7.6** | 11.1 |
| ***Coenonympha pamphilus*** | 11.4 | 14.2 | 10.7 | 14.2 | 10.7 | 9.5 | 11.4 | 5.3 | 9.2 | **14.2** | **5.3** | 11.1 | 11.4 | | 10.7 | 7.8 | 5.3 | | 10.7 | 7.0 |
| ***Plebejus argus*** | 5.9 | 9.0 | 7.6 | 9.0 | 11.8 | 8.6 | 5.9 | 6.8 | 7.4 | 9.0 | 6.8 | 8.6 | **5.9** | | **11.8** | 8.0 | 6.8 | | 11.8 | 8.8 |
| ***Vanessa atalanta*** | 10.8 | 5.4 | 10.0 | 5.4 | 2.4 | 5.2 | 10.8 | 9.3 | 9.3 | 5.4 | 9.3 | 8.6 | **10.8** | | **2.4** | 8.6 | 9.3 | | 2.4 | 6.8 |
| ***Polyommatus icarus*** | 6.2 | 5.8 | 6.9 | **5.8** | **8.0** | 7.0 | 6.2 | 6.7 | 7.6 | 5.8 | 6.7 | 7.4 | 6.2 | | 8.0 | 6.6 | 6.7 | | 8.0 | 7.0 |
| ***Maniola jurtina*** | 4.7 | 6.3 | 6.5 | 6.3 | 5.3 | 5.9 | 4.7 | 1.2 | 4.6 | **6.3** | **1.2** | 5.9 | 4.7 | | 5.3 | 4.7 | 1.2 | | 5.3 | 4.6 |
| ***Iphiclides podalirius*** | - | - | - | - | - | - | **3.8** | **6.6** | 6.1 | 3.2 | 6.6 | 5.8 | - | | - | - | 6.6 | | 5.8 | 5.4 |
| ***Thymelicus acteon*** | 5.2 | 2.3 | 5.5 | 2.3 | 1.6 | 3.0 | **5.2** | **1.9** | 5.3 | 2.3 | 1.9 | 3.2 | 5.2 | | 1.6 | 4.9 | - | | - | - |
| ***Lasiommata megera*** | 4.02 | 4.44 | 5.08 | 4.4 | 4.3 | 4.8 | **4.0** | **0.6** | 3.7 | 4.4 | 0.6 | 4.0 | 4.0 | | 4.3 | 4.3 | 0.6 | | 4.3 | 3.4 |
| ***Plebejus idas*** | 3.89 | 1.67 | 4.66 | - | - | - | **3.9** | **0.0** | 3.4 | - | - | - | 3.9 | | 1.1 | 4.1 | - | | - | - |
| ***Iphiclides podalirius*** | 3.76 | 3.19 | 4.2 | **3.2** | **5.8** | 4.6 | **-** | **-** | - | - | - | - | **3.8** | | **5.8** | 4.8 | - | | - | - |
| ***Colias crocea*** | **1.1** | **4.48** | 4.04 | 4.5 | 3.1 | 4.2 | 1.1 | 2.3 | 2.7 | 4.5 | 2.3 | 4.9 | 1.1 | | 3.1 | 2.8 | 2.3 | | 3.1 | 3.6 |
| ***Aricia agestis*** | 2.58 | 2.5 | 3.47 | 2.5 | 4.0 | 3.9 | **2.6** | **0.9** | 2.7 | 2.5 | 0.9 | 2.5 | 2.6 | | 4.0 | 4.0 | 0.9 | | 4.0 | 3.2 |
| ***Polyommatus thersites*** | - | - | - | - | - | - | **0.0** | **3.0** | 2.6 | **0.0** | **3.0** | 2.6 | - | | - | - | 3.0 | | 0.7 | 2.8 |
| ***Melanargia galathea*** | - | - | - | **0.3** | **3.5** | 3.1 | **-** | **-** | - | - | - | - | **0.0** | | **3.5** | 3.0 | **0.0** | | **3.5** | 2.8 |

**Table S3**. Results from SIMPER analysis for differences in butterfly species composition among the four clusters within the city of Bologna. This analysis shows which species contribute the most to dissimilarity between pairs of clusters and provides a percentage of this contribution. In the first two columns average abundance of species in each cluster is shown; in the third column the % of species contribution (% C.) to dissimilarity between pair of clusters is shown (only species with % contribution upper then 2.5% are shown). For each species, the values ​​where the difference in abundance between the clusters is maximum are highlighted in bold.

**Table S4.** Results from SIMPER analysis for differences in bird’s species composition among the four clusters within the city of Bologna. This analysis shows which species contribute the most to dissimilarity between pairs of clusters and provides a percentage of this contribution. In the first two columns average abundance of species in each cluster is shown; in the third column the % of species contribution (% C.) to dissimilarity between pair of clusters is shown (only species with % contribution upper then 2.5% are shown). For each species, the values ​​of the maximum difference between clusters are highlighted in bold.

| **% DISSIMILARITY** | **58.26%** | | | | **60.30%** | | | | **55.90%** | | | | **52.45%** | | | **61.23%** | | | | **59.21%** | | |
| --- | --- | --- | --- | --- | --- | --- | --- | --- | --- | --- | --- | --- | --- | --- | --- | --- | --- | --- | --- | --- | --- | --- |
| **SPECIES** | **CL1** | **CL2** | **%C.** | **CL2** | | **CL4** | **%C.** | **CL1** | | **CL3** | **%C.** | **CL2** | | **CL3** | **%C.** | **CL1** | **CL4** | **%C.** | **CL3** | | **CL4** | **%C.** |
| ***Sturnus vulgaris*** | 8.96 | 7.62 | 6.85 | 7.62 | | 6.44 | 6.8 | 8.96 | | 7.06 | 6.51 | 7.62 | | 7.06 | 5.88 | **8.96** | **6.4** | 7.52 | 7.06 | | 6.44 | 6.35 |
| ***Apus apus/pallidus*** | 4.19 | 7.22 | 6.68 | 7.22 | | 3.65 | 6.67 | 4.19 | | 8.44 | 6.32 | 7.22 | | 8.44 | 8.64 | 4.19 | 3.7 | 4.3 | **8.44** | | **3.65** | 6.72 |
| ***Columba livia domestica*** | 8.24 | 5.83 | 6.42 | 5.83 | | 1.91 | 4.63 | 8.24 | | 8.07 | 6.71 | 5.83 | | 8.07 | 5.67 | **8.24** | **1.9** | 6.4 | 8.07 | | 1.91 | 6.03 |
| ***Hirundo rustica*** | **5** | **1** | 4.36 | 1 | | 3.33 | 2.99 | 5.03 | | 1.07 | 4.68 | 4.27 | | 2.53 | 3.67 | 5.03 | 3.33 | 3.78 | 1.07 | | 3.33 | 3.22 |
| ***Psittacula krameri*** | 4.34 | 3.22 | 3.54 | 3.22 | | 0.88 | 2.65 | 4.34 | | 2.94 | 3.62 | 3.2 | | 2.9 | 3.24 | **4.34** | **0.9** | 3.4 | 2.94 | | 0.88 | 2.5 |
| ***Turdus merula*** | 4.05 | 5.73 | 3.44 | 5.73 | | 4.84 | 2.89 | **4.1** | | **6.7** | 3.54 | 5.73 | | 6.69 | 3.57 | - | - | - | 6.69 | | 4.84 | 2.71 |
| ***Phasianus colchicus*** | 5.56 | 4.27 | 3.19 | 4.27 | | 4.12 | 2.84 | **5.6** | | **2.5** | 3.65 | 6.59 | | 6.79 | 3.16 | - | - | - | - | | - | - |
| ***Columba palumbus*** | 7.24 | 6.59 | 3.09 | **6.6** | | **7** | 2.84 | **-** | | **-** | - | - | | - | - | - | - | - | - | | - | - |
| ***Luscinia megarhynchos*** | 3.1 | 2.76 | 3.05 | 2.76 | | 2.65 | 2.7 | **3.1** | | **1** | 2.77 | 2.76 | | 0.96 | 2.8 | - | - | - | - | | - | - |
| ***Corvus cornix*** | **4.5** | **6.39** | 2.9 | - | | - | - | 4.46 | | 6.17 | 3.17 | 6.4 | | 6.17 | 2.56 | 4.46 | 5.82 | 2.67 | - | | - | - |
| ***Pica pica*** | **4.3** | **2.48** | 2.9 | 2.48 | | 2.75 | 2.6 | 4.3 | | 3.17 | 2.67 | 2.48 | | 3.17 | 2.98 | 4.3 | 2.75 | 2.7 | 3.17 | | 2.75 | 2.6 |
| ***Parus major*** | **3.3** | **4.31** | 2.87 | 4.31 | | 4.1 | 2.89 | - | | - | - | 4.31 | | 4.91 | 2.81 | 3.31 | 4.1 | 2.59 | - | | - | - |
| ***Phasianus colchicus*** | - | - | - | - | | - | - | - | | - | - |  | |  |  | - | - | - | **2.53** | | **4.12** | 2.82 |
| ***Serinus serinus*** | - | - | - | - | | - | - | **1** | | **4.5** | 3.53 | 1.85 | | 4.48 | 3.5 | - | - | - | 4.48 | | 1.28 | 3.27 |
| ***Carduelis carduelis*** | - | - | - | - | | - | - | 1.66 | | 3.88 | 3.29 | 2.55 | | 3.88 | 3.58 | - | - | - | **3.88** | | **0.92** | 3.19 |
| ***Streptopelia decaocto*** | - | - | - | - | | - | - | 1.93 | | 4.61 | 3.27 | 1.67 | | 4.61 | 3.55 | - | - | - | **4.61** | | **0.42** | 3.7 |
| ***Fringilla coelebs*** | - | - | - | 2.79 | | 3.27 | 2.54 | **0.9** | | **3.6** | 2.96 | 2.79 | | 3.6 | 2.59 | 0.88 | 3.27 | 2.61 | - | | - | - |
| ***Phoenicurus phoenicurus*** | - | - | - | - | | - | - | **1.1** | | **3** | 2.51 | - | | - | - | - | - | - | - | | - | - |
| ***Aegithalos caudatus*** | - | - | - | - | | - | - | - | | - | - | **1.5** | | **2.2** | 2.65 | - | - | - | - | | - | - |
| ***Sylvia atricapilla*** | - | - | - | - | | - | - | - | | - | - | **4.6** | | **4.2** | 2.63 | - | - | - | - | | - | - |
| ***Emberiza cirlus*** | - | - | - | **0** | | **3.4** | 2.82 | - | | - | - | - | | - | - | **0** | **3.4** | 2.78 | **0** | | **3.41** | 2.88 |

**Figure S1.** Results of finite Gaussian mixture models (which assume a multivariate Gaussian distribution for each component), fitting models with 1–10 mixture components (clusters), ordered by Bayesian Information Criterion (BIC, Schwarz, 1978) to determine the most likely number of clusters (N=4 in the ellipsoidal, equal shape model – VEV). We used the function ‘Mclust’ – with default parameters – in the R package ‘mclust’ (Scrucca et al., 2016).

**
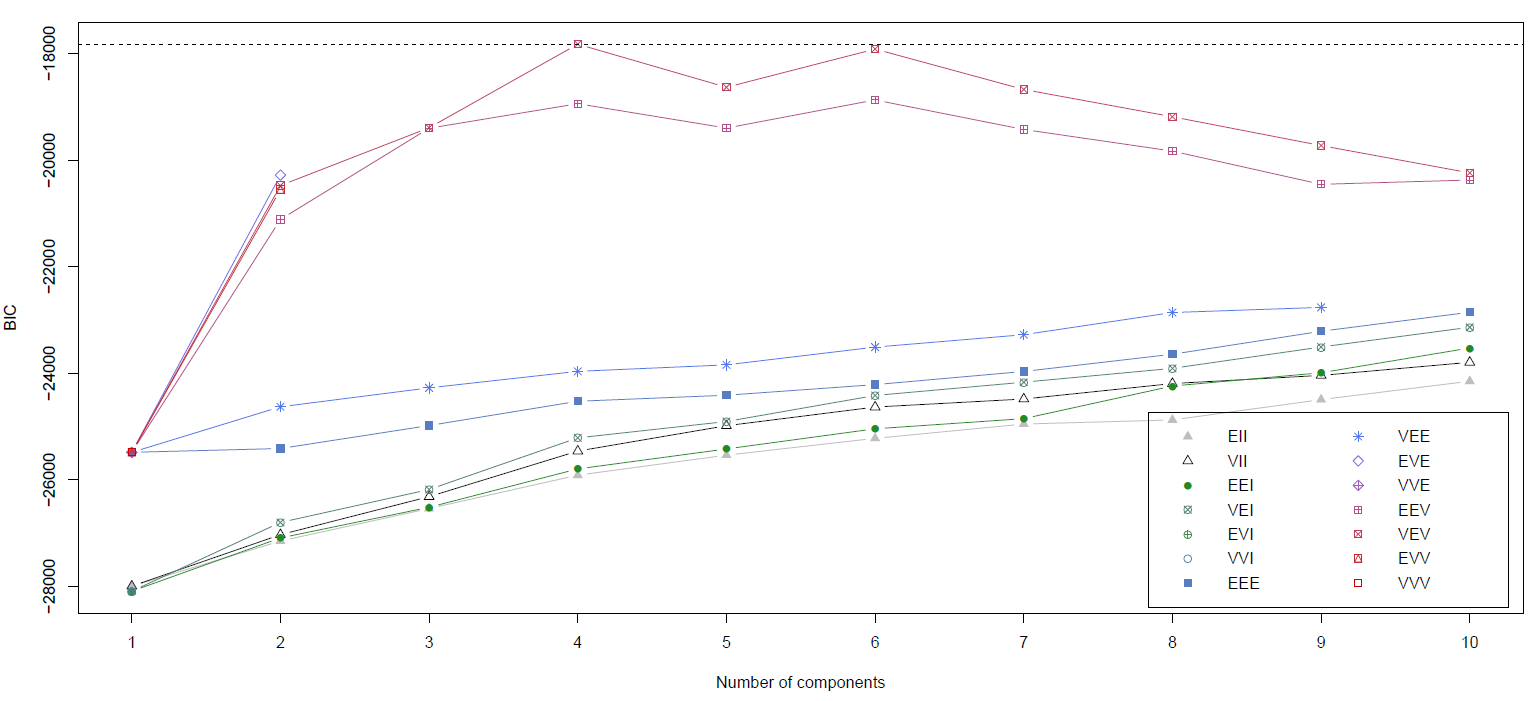
**
